# Supplementary material
Source: PubMed Central journal article supplement (PMC11027701)
Supplement: 262_2020_2563_MOESM1_ESM.pdf [file 262_2020_2563_MOESM1_ESM.pdf]

## Supplementary figure legends

**Supplementary figure 1.** (A-B) KEGG and GO pathway were enriched in CD39<sup>+</sup>CD8<sup>+</sup> T cell score high group. (C) Correlation of CD39<sup>+</sup>CD8<sup>+</sup> T cells score and effector/exhausted markers from TCGA.

## Supplementary figure 2. Representative staining pictures of immune cells.

(A) Representative pictures of B cell= B cells, CD4= CD4<sup>+</sup> T cells, Th1= type 1 T helper cells, Th2= type 2 T helper cells, CD8=CD8<sup>+</sup> T cells, NK= nature killer cells, Treg= regulatory T cells.

(B) Representative pictures of DC= dendritic cells, M1=M1 macrophages, M2=M2 macrophages, Mast= mast cells, Neut= neutrophils.

**Supplementary figure 3.** (A) Representative staining pictures of VEGFA<sup>+</sup> cells.(B) Comparison of the VEGFA<sup>+</sup> cells between high/low percentage of CD39<sup>+</sup>CD8<sup>+</sup> T cells (n=85).\*\*  $p < 0.01$ . (C) High percentage of CD39<sup>+</sup>CD8<sup>+</sup> T cells was associated with high proportion of VEGFA<sup>+</sup> cells (n=85, Spearman's  $r=0.3646$ ,  $p=0.0006$ ).

**Supplementary Table 1. Clinical characteristics of non-metastatic ccRCC.**

**Supplementary Table 2. Clinical characteristics of metastatic ccRCC.**

**Supplementary Table 3. Immunohistochemistry (IHC) antibodies.**

**Supplementary Table 4. Flow cytometry (FCM) antibodies.**

**Supplementary Table 5. Gene list of signature.**

**Supplementary Table 6. Clinical characteristics of 48 ccRCC patients.**

**Supplementary methods**
