# Supplementary material
Source: PubMed Central journal article supplement (PMC11027701)

**A**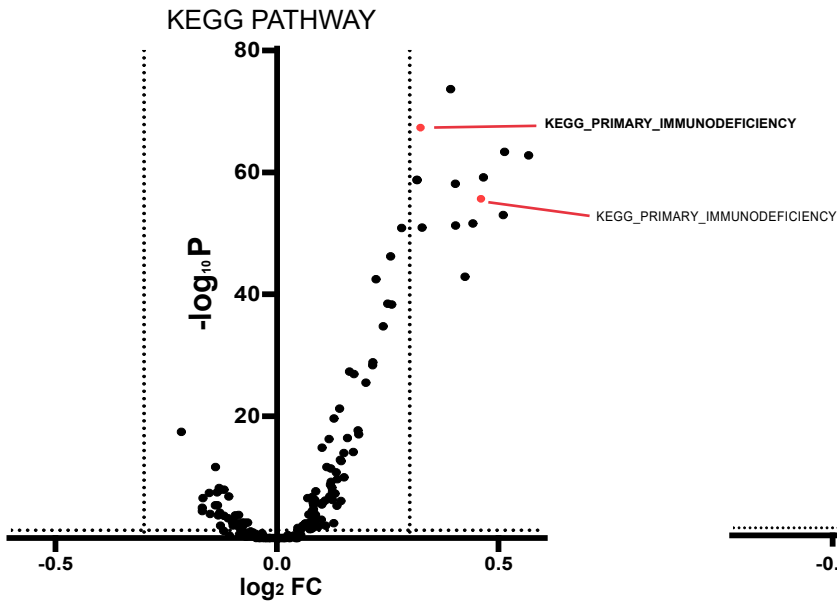**B**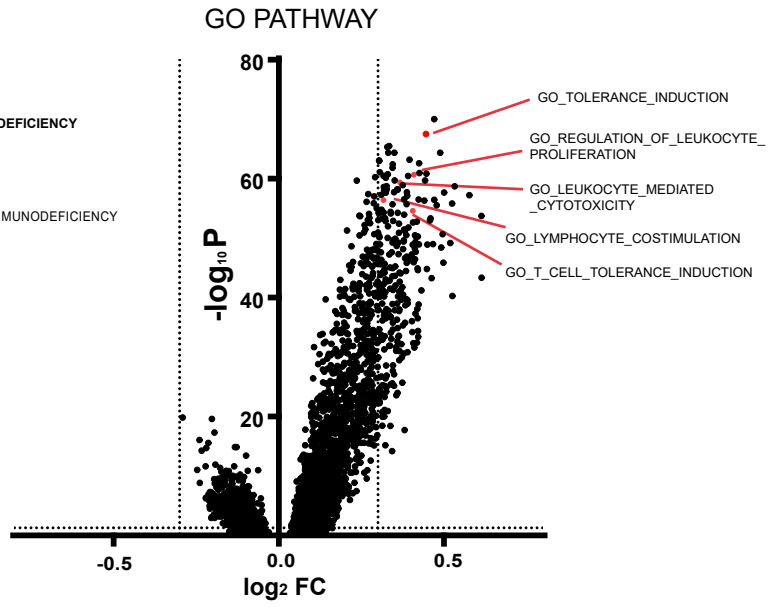**C**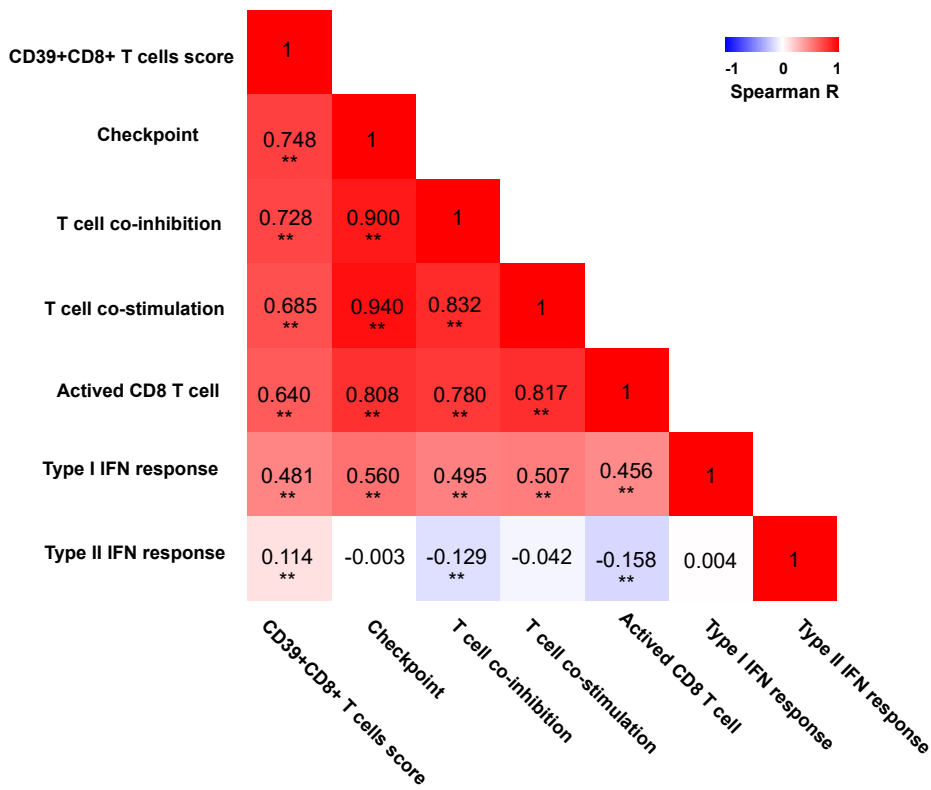

Supplement: 262_2020_2563_MOESM2_ESM.pdf [file 262_2020_2563_MOESM2_ESM.pdf]

**A**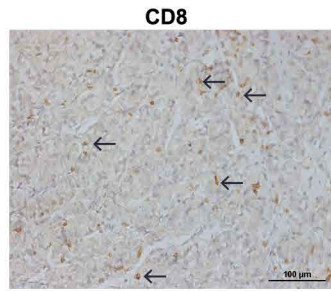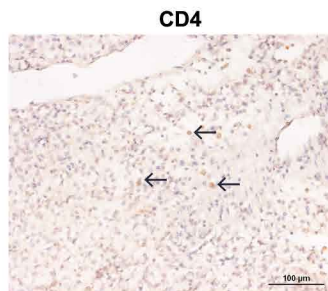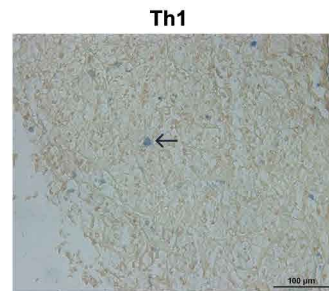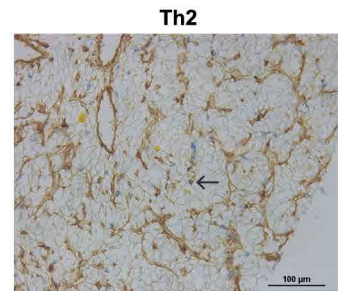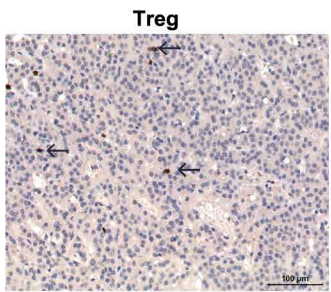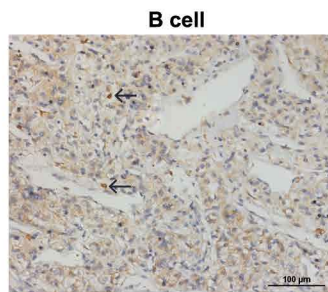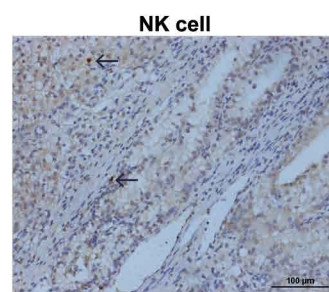**B**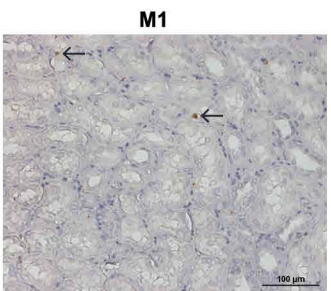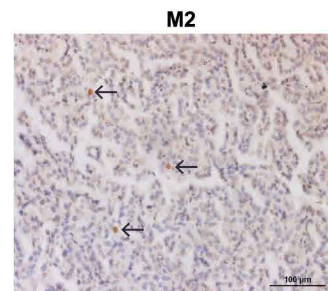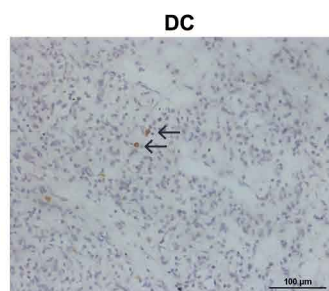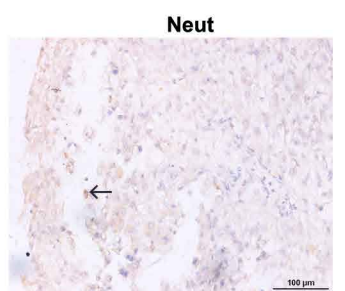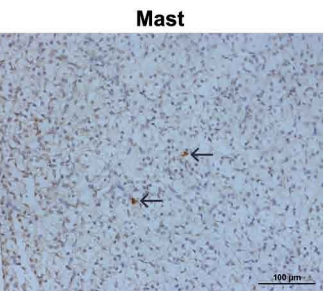

Supplement: 262_2020_2563_MOESM3_ESM.pdf [file 262_2020_2563_MOESM3_ESM.pdf]
